# Supplementary material for: Tetragonal alkali metal tungsten bronze and hexagonal tungstate nanorods synthesized by alkalide reduction
Source: Royal Society of Chemistry journal article supplement (doi:10.1039/b906888k), 2009-01-01
Supplement: b906888k.pdf [file b906888k.pdf]

Supplemental Figures for manuscript B906888K “Tetragonal Alkali Metal Tungsten Bronze and Hexagonal Tungstate Nanorods Synthesized by Alkalide Reduction”  
Olivera Zivkovic, Chao Yan and Michael J. Wagner

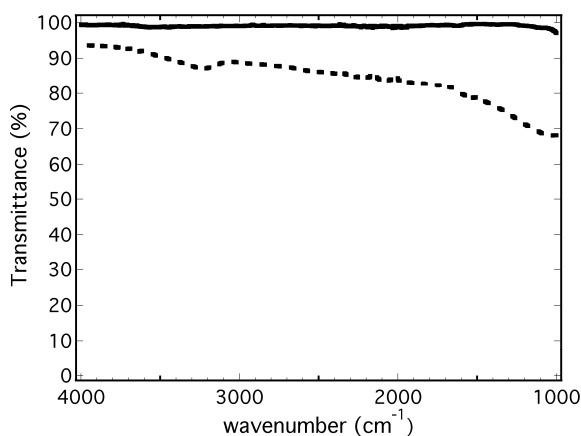

Supplemental Figure 1: IR spectra of the tetragonal tungsten bronze nanorods (dashed line) and hexagonal potassium tungstate nanorods (solid line).

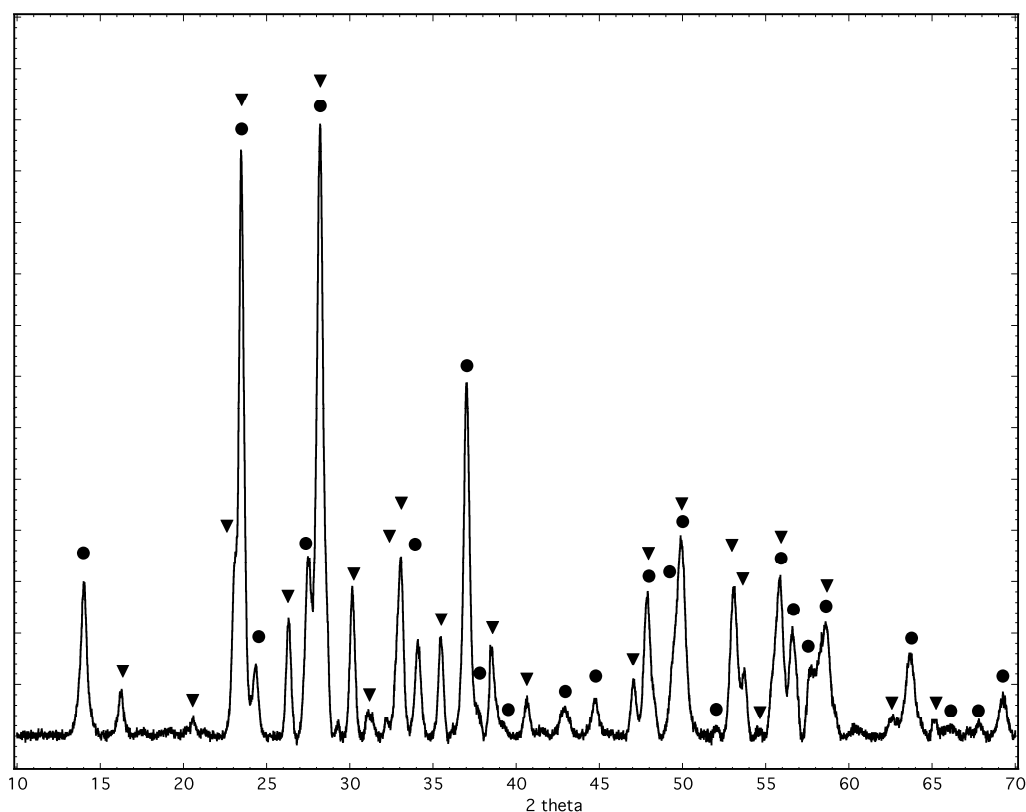

Supplemental Figure 2: Powder XRD pattern of the product of annealing hexagonal potassium tungstate nanorods in 10% H<sub>2</sub> for 1 h. The filled triangles and circles indicate

the positions of peaks consistent with tetragonal potassium tungsten bronze and a hexagonal phase (either tungstate or bronze) respectively.

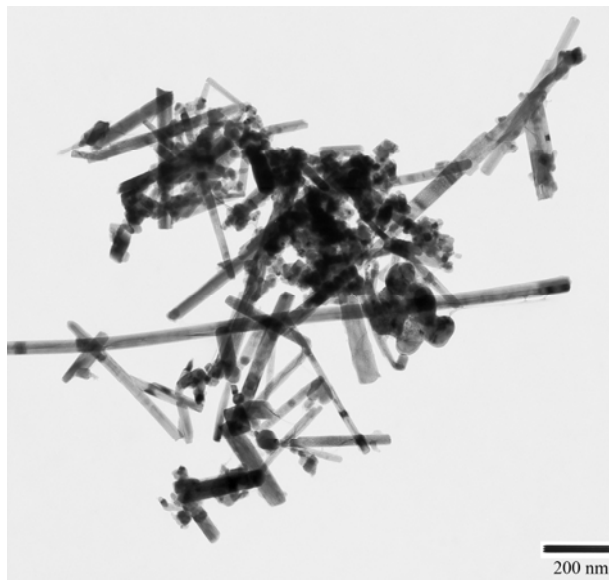

Supplemental Figure 3: TEM micrograph of the product of annealing hexagonal potassium tungstate nanorods in 10%  $\text{H}_2$  for 1 h.
